# Supplementary material for: Does clinical outcome of birch pollen immunotherapy relate to induction of blocking antibodies preventing IgE from allergen binding? A pilot study monitoring responses during first year of AIT
Source: Springer Nature journal article supplement (doi:10.1186/s13601-018-0226-7), 2018-09-12
Supplement: MOESM1 [file 16180878]

**Additional file 1.** ImmunoCAP analyses of AIT patients' sera.

| Patients | Bet v 1-specific IgE |       |      | Bet v 2-specific IgE |      |      | Bet v 4-specific IgE |       |       | Total IgE |       |       | Bet v 1-specific IgG4 |     |     |
|----------|----------------------|-------|------|----------------------|------|------|----------------------|-------|-------|-----------|-------|-------|-----------------------|-----|-----|
|          | [kUA/l]              |       |      | [kUA/l]              |      |      | [kUA/l]              |       |       | [kU/l]    |       |       | [mgA/l]               |     |     |
|          | T0                   | T1    | T2   | T0                   | T1   | T2   | T0                   | T1    | T2    | T0        | T1    | T2    | T0                    | T1  | T2  |
| P1       | 40.2                 | 42.7  | 19.8 | <0.1                 | <0.1 | <0.1 | <0.01                | <0.01 | <0.01 | 90.5      | 80.3  | 49.9  | 0.3                   | 0.6 | 4.3 |
| P2       | 4.4                  | 5.8   | 4.8  | <0.01                | <0.1 | <0.1 | <0.01                | <0.01 | <0.01 | 23.2      | 28.7  | 22.0  | 0.2                   | 1.9 | 3.3 |
| P3       | 26.3                 | 53.3  | 38.0 | <0.1                 | <0.1 | <0.1 | <0.01                | <0.01 | <0.01 | 188.0     | 203.0 | 156.0 | 0.7                   | 3.0 | 3.5 |
| P4       | 51.1                 | 159.0 | 81.3 | <0.1                 | 0.1  | 0.17 | <0.01                | <0.01 | <0.01 | 292.0     | 463.0 | 488.0 | <0.1                  | 2.9 | 4.3 |
| P5       | 10.3                 | 17.5  | 10.0 | <0.1                 | <0.1 | <0.1 | <0.1                 | <0.1  | <0.1  | 37.1      | 51.9  | 40.5  | 1.3                   | 5.7 | 4.6 |

P1–5, AIT patients; T0, before AIT; T1, two weeks after reaching the maintenance dose; T2, one year after starting AIT
