# Supplementary material for: Does clinical outcome of birch pollen immunotherapy relate to induction of blocking antibodies preventing IgE from allergen binding? A pilot study monitoring responses during first year of AIT
Source: Springer Nature journal article supplement (doi:10.1186/s13601-018-0226-7), 2018-09-12
Supplement: MOESM2 [file 16180878]

**Additional file 2.** Bet v 1-specific serum antibody titer.

| Serum | IgE titer |      |      | IgG4 titer |       |       | IgG1 titer |      |       | IgA titer |       |       | IgM titer |       |       | Ratio titer IgE/IgG4 |      |      |
|-------|-----------|------|------|------------|-------|-------|------------|------|-------|-----------|-------|-------|-----------|-------|-------|----------------------|------|------|
|       | T0        | T1   | T2   | T0         | T1    | T2    | T0         | T1   | T2    | T0        | T1    | T2    | T0        | T1    | T2    | T0                   | T1   | T2   |
| P1    | 2926      | 2377 | 1737 | 597        | 1506  | 13854 | 1258       | 5461 | 6443  | 21806     | 15863 | 16514 | 23680     | 22720 | 20267 | 4.90                 | 1.58 | 0.13 |
| P2    | 203       | 226  | 208  | 200        | 5369  | 7502  | 162        | 441  | 450   | 9542      | 10705 | 9309  | 6991      | 8172  | 4726  | 1.02                 | 0.04 | 0.03 |
| P3    | 951       | 2286 | 1493 | 899        | 2198  | 1419  | 96         | 94   | 100   | 17371     | 19017 | 16823 | 4928      | 6080  | 3392  | 1.06                 | 1.04 | 1.05 |
| P4    | 1327      | 1967 | 1253 | 105        | 3760  | 7320  | 2400       | 1653 | 2187  | 7782      | 13824 | 11469 | 26880     | 28800 | 23253 | 12.64                | 0.52 | 0.17 |
| P5    | 231       | 284  | 251  | 597        | 14440 | 15520 | 4538       | 7447 | 10938 | 3482      | 5427  | 5325  | 16640     | 17067 | 17280 | 0.39                 | 0.02 | 0.02 |
| NA    | 3         |      |      | 0          |       |       | 37         |      |       | 8611      |       |       | 11324     |       |       | id                   |      |      |
| NBA   | 7         |      |      | 14         |       |       | 284        |      |       | 5440      |       |       | 7680      |       |       | 0.50                 |      |      |
| IND   | 14938     |      |      | 527        |       |       | 762        |      |       | 7694      |       |       | 30927     |       |       | 28.35                |      |      |

P1–5, patients receiving birch pollen AIT; NA, non-allergic serum donor; NBA, non birch allergic serum donor; IND, indicator serum pool; T0, before AIT; T1, two weeks after reaching the maintenance dose; T2, one year after starting AIT; id, indeterminable
