# Supplementary material for: Does clinical outcome of birch pollen immunotherapy relate to induction of blocking antibodies preventing IgE from allergen binding? A pilot study monitoring responses during first year of AIT
Source: Springer Nature journal article supplement (doi:10.1186/s13601-018-0226-7), 2018-09-12
Supplement: MOESM3 [file 16180878]

## Correlation ImmunoCAP

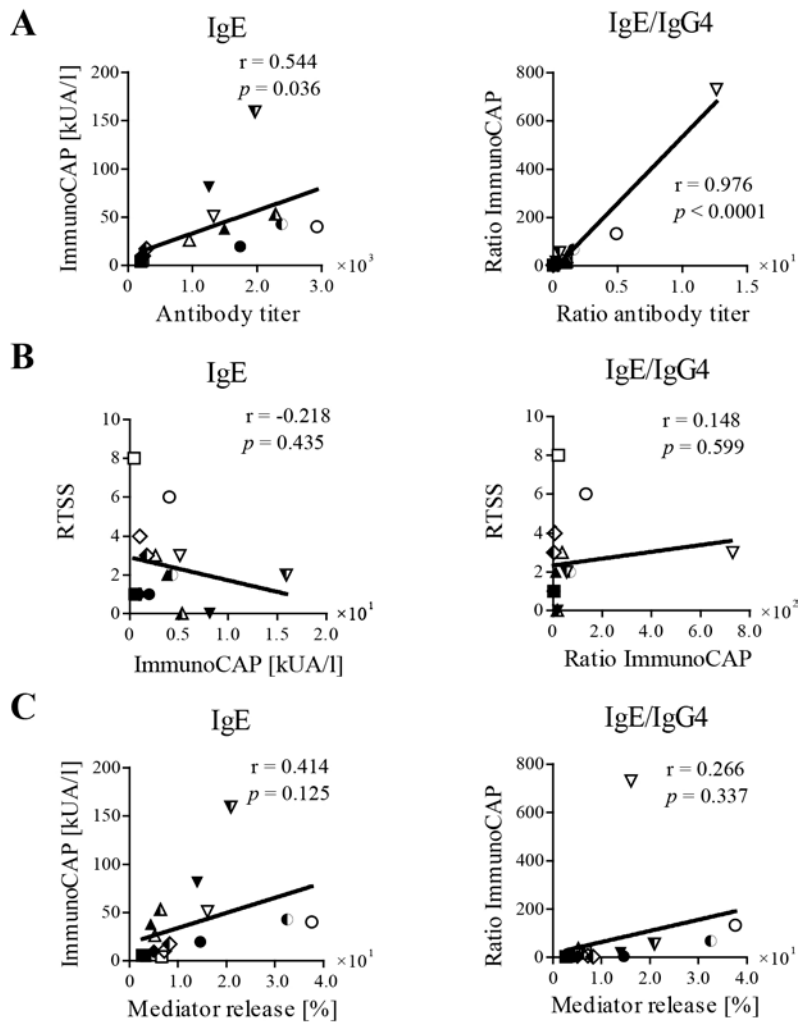

AIT patients (P1○; P2□; P3△; P4▽; P5◇)

**Additional file 3.** Correlation of Bet v 1-specific serum IgE levels and IgE/IgG4 ratios measured by ImmunoCAP with levels determined by ELISA (A), RTSS (B), and percent mediator release triggered by a concentration of 10 ng/ml Bet v 1 (C). Serum samples were obtained at three different time points (T0, open; T1, semi-filled; T2, filled symbols).
