# Supplementary material for: Does clinical outcome of birch pollen immunotherapy relate to induction of blocking antibodies preventing IgE from allergen binding? A pilot study monitoring responses during first year of AIT
Source: Springer Nature journal article supplement (doi:10.1186/s13601-018-0226-7), 2018-09-12
Supplement: MOESM4 [file 16180878]

## Mediator Release Assay

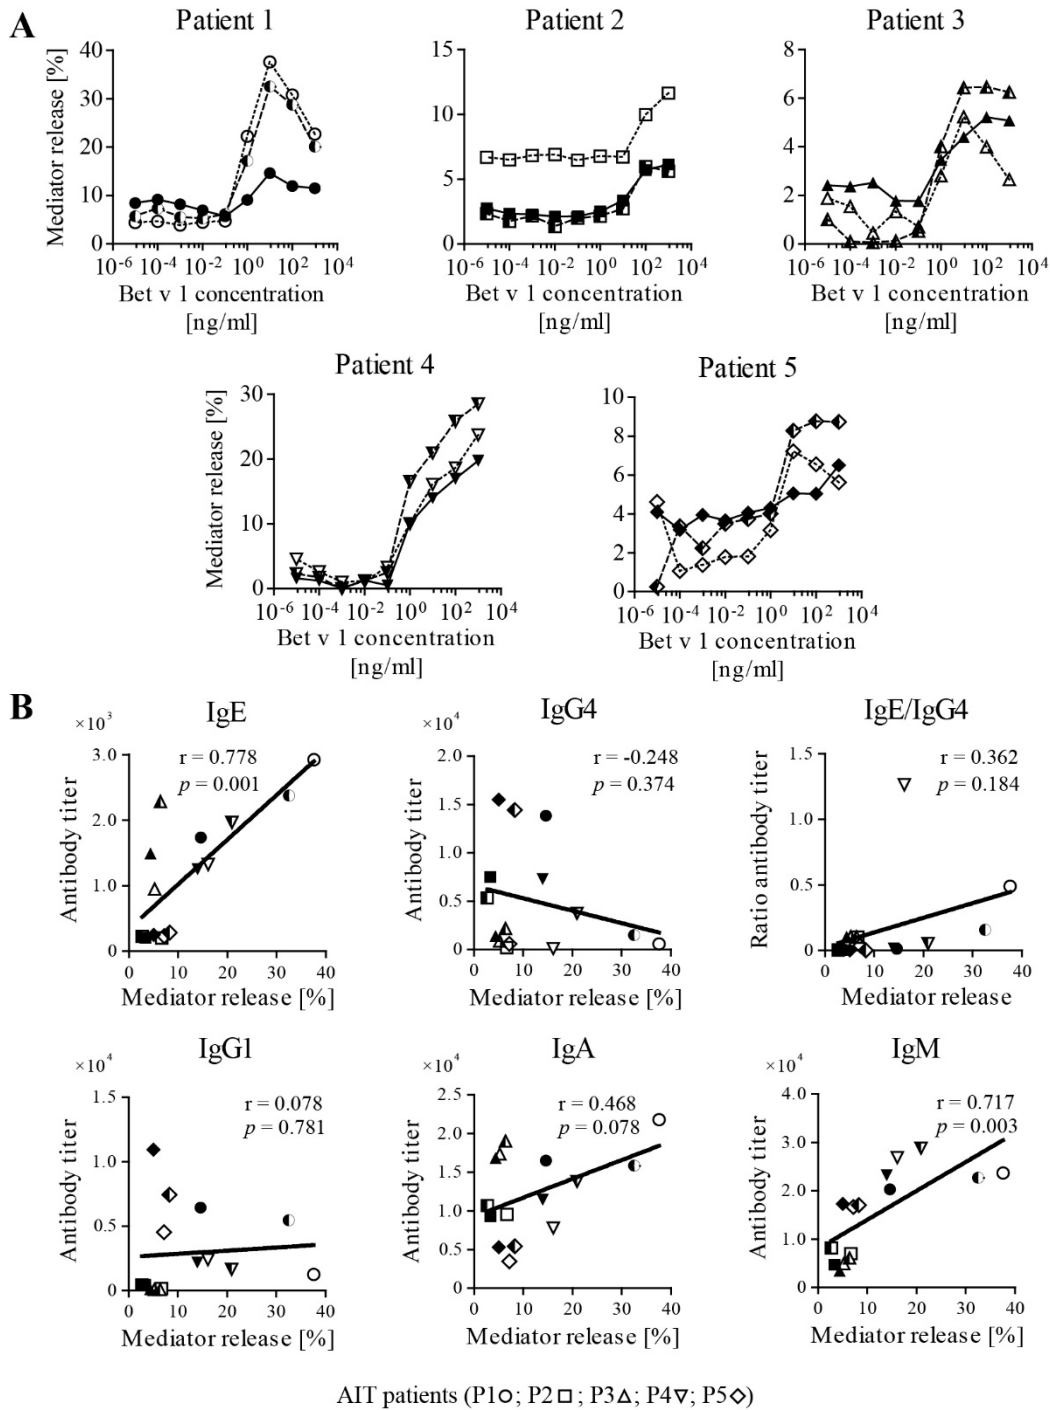

**Additional file 4.** Mediator release of RBL-2H3 cells during AIT. For each patient the percentage of  $\beta$ -hexosaminidase release was determined at different Bet v 1 concentrations with sera obtained at three different time points (T0, open; T1, semi-filled; T2, filled symbols) of AIT (A). Correlation of Bet v 1-specific serum antibody titer measured by ELISA with mediator release triggered by a concentration of 10 ng/ml Bet v 1 (B).
