# Supplementary material for: Does clinical outcome of birch pollen immunotherapy relate to induction of blocking antibodies preventing IgE from allergen binding? A pilot study monitoring responses during first year of AIT
Source: Springer Nature journal article supplement (doi:10.1186/s13601-018-0226-7), 2018-09-12
Supplement: MOESM5 [file 16180878]

**Additional file 5.** Bet v 1-specific serum antibody avidity indices.

|     | IgE avidity index |      |      | IgG4 avidity index |      |      | IgG1 avidity index |      |      | IgA avidity index |      |      | IgM avidity index |      |      | Ratio avidity indices |      |      |
|-----|-------------------|------|------|--------------------|------|------|--------------------|------|------|-------------------|------|------|-------------------|------|------|-----------------------|------|------|
|     | [M]               |      |      | [M]                |      |      | [M]                |      |      | [M]               |      |      | [M]               |      |      | IgE/IgG4              |      |      |
|     | T0                | T1   | T2   | T0                 | T1   | T2   | T0                 | T1   | T2   | T0                | T1   | T2   | T0                | T1   | T2   | T0                    | T1   | T2   |
| P1  | 1.48              | 1.17 | 1.33 | 1.53               | 1.77 | 1.18 | 1.21               | 1.12 | 1.08 | 1.87              | 2.31 | 1.75 | 1.87              | 1.50 | 1.50 | 0.97                  | 0.66 | 1.13 |
| P2  | 2.04              | 1.62 | 1.46 | 0.99               | 2.37 | 1.61 | 1.70               | 0.23 | 0.21 | 1.14              | 1.23 | 0.94 | 1.40              | 1.53 | 1.42 | 2.06                  | 0.68 | 0.91 |
| P3  | 1.45              | 2.25 | 1.86 | 1.14               | 0.89 | 0.9  | 0.13               | 0.14 | 0.14 | 0.25              | 0.57 | 0.41 | 0.85              | 1.18 | 0.83 | 1.27                  | 2.53 | 2.07 |
| P4  | 0.91              | 0.88 | 0.44 | 0.78               | 0.78 | 0.87 | 0.90               | 2.50 | 1.68 | 0.23              | 0.81 | 0.87 | 1.87              | 1.45 | 1.29 | 1.17                  | 1.13 | 0.51 |
| P5  | 2.48              | 2.15 | 1.93 | 2.24               | 2.18 | 1.81 | 1.98               | 2.18 | 1.32 | 0.89              | 1.14 | 0.66 | 2.21              | 1.89 | 0.87 | 1.11                  | 0.99 | 1.07 |
| NA  | id                |      |      | id                 |      |      | id                 |      |      | 2.95              |      |      | 1.26              |      |      | id                    |      |      |
| NBA | id                |      |      | id                 |      |      | 0.24               |      |      | 0.45              |      |      | 1.15              |      |      | id                    |      |      |
| IND | 1.20              |      |      | 0.60               |      |      | 2.23               |      |      | 1.99              |      |      | 2.81              |      |      | 0.54                  |      |      |

P1–5, patients receiving birch pollen AIT; NA, non-allergic serum donor; NBA, non birch allergic serum donor; IND, indicator serum pool; [M], molar concentration; T0, before AIT; T1, two weeks after reaching the maintenance dose; T2, one year after starting AIT; id, indeterminable
