# Supplementary material for: Does clinical outcome of birch pollen immunotherapy relate to induction of blocking antibodies preventing IgE from allergen binding? A pilot study monitoring responses during first year of AIT
Source: Springer Nature journal article supplement (doi:10.1186/s13601-018-0226-7), 2018-09-12
Supplement: MOESM6 [file 16180878]

## FAB Assay

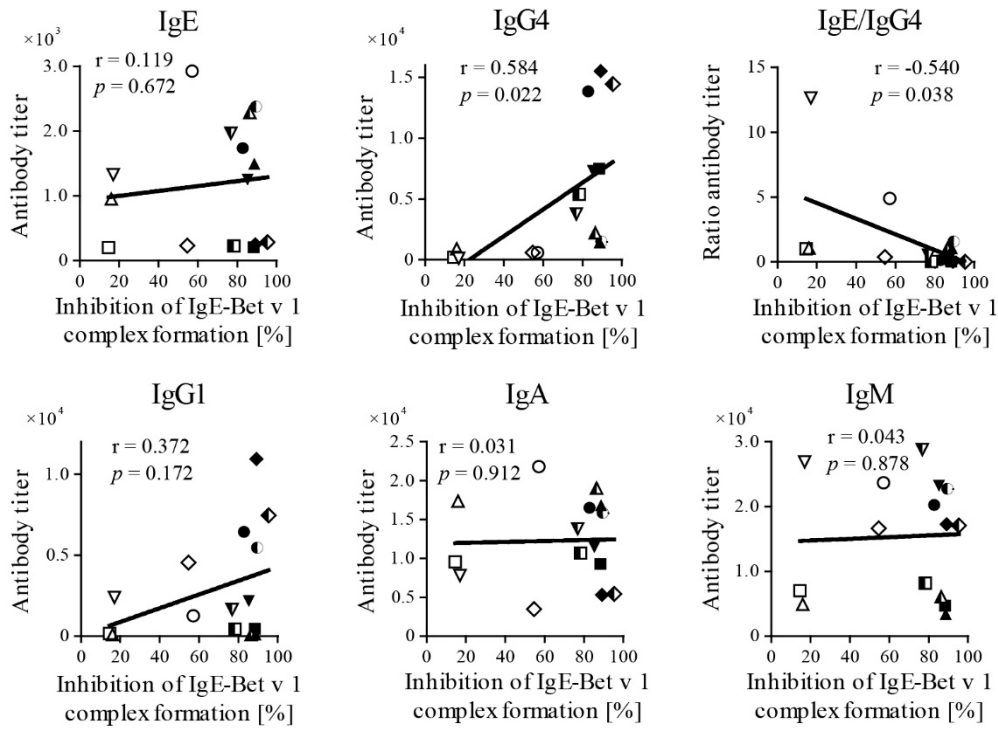

AIT patients (P1○; P2□; P3△; P4▽; P5◇)

**Additional file 6.** Correlation of Bet v 1-specific serum antibody titer measured by ELISA with percent inhibition of IgE-Bet v 1 complex formation measured by FAB assay. Serum samples were obtained at three different time points (T0, open; T1, semi-filled; T2, filled symbols) and correlated with each other.
