# Supplementary material for: Does clinical outcome of birch pollen immunotherapy relate to induction of blocking antibodies preventing IgE from allergen binding? A pilot study monitoring responses during first year of AIT
Source: Springer Nature journal article supplement (doi:10.1186/s13601-018-0226-7), 2018-09-12
Supplement: MOESM7 [file 16180878]

## Direct ELISA

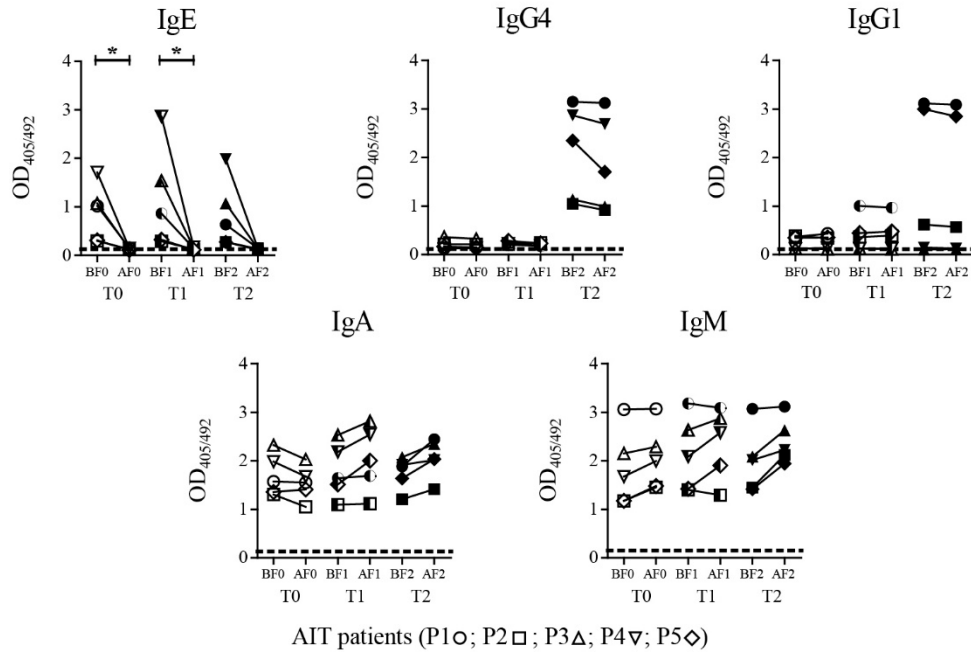

**Additional file 7.** Reactivity of serum antibody subclasses before (BF) and after (AF) heat inactivation. The OD<sub>405/492</sub> of the serum samples was obtained at three different time points of AIT (T0, open; T1, semi-filled; T2, filled symbols). The limit of detection defined as three times standard deviation of the buffer control was used as cutoff value.
