# Supplementary material for: Does clinical outcome of birch pollen immunotherapy relate to induction of blocking antibodies preventing IgE from allergen binding? A pilot study monitoring responses during first year of AIT
Source: Springer Nature journal article supplement (doi:10.1186/s13601-018-0226-7), 2018-09-12
Supplement: MOESM9 [file 16180878]

## Inhibition Mediator Release Assay

+ indicator serum pool

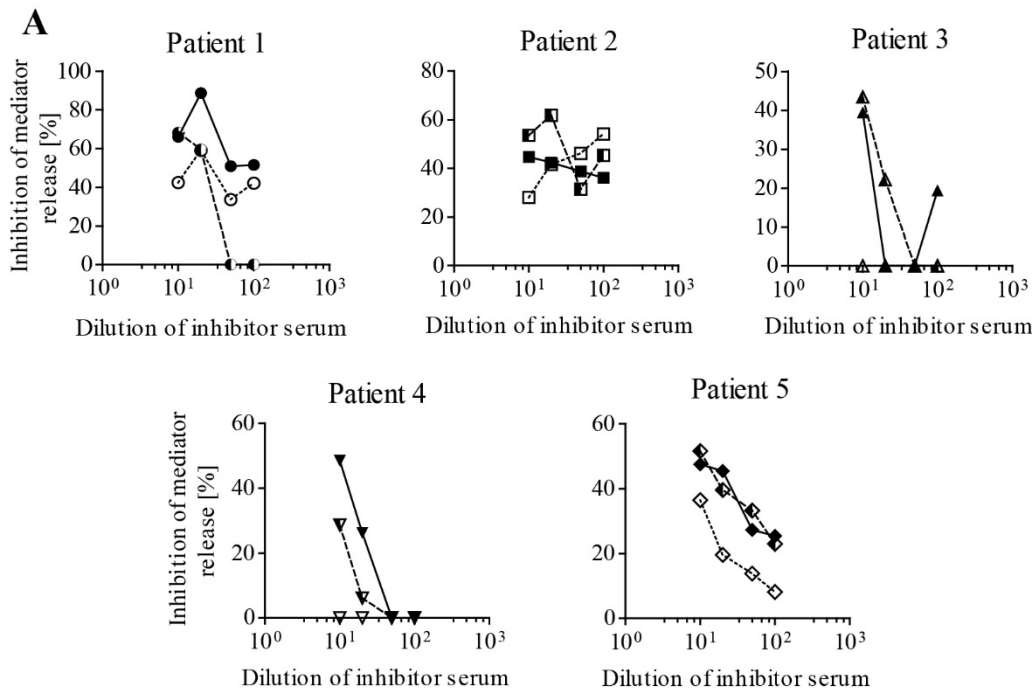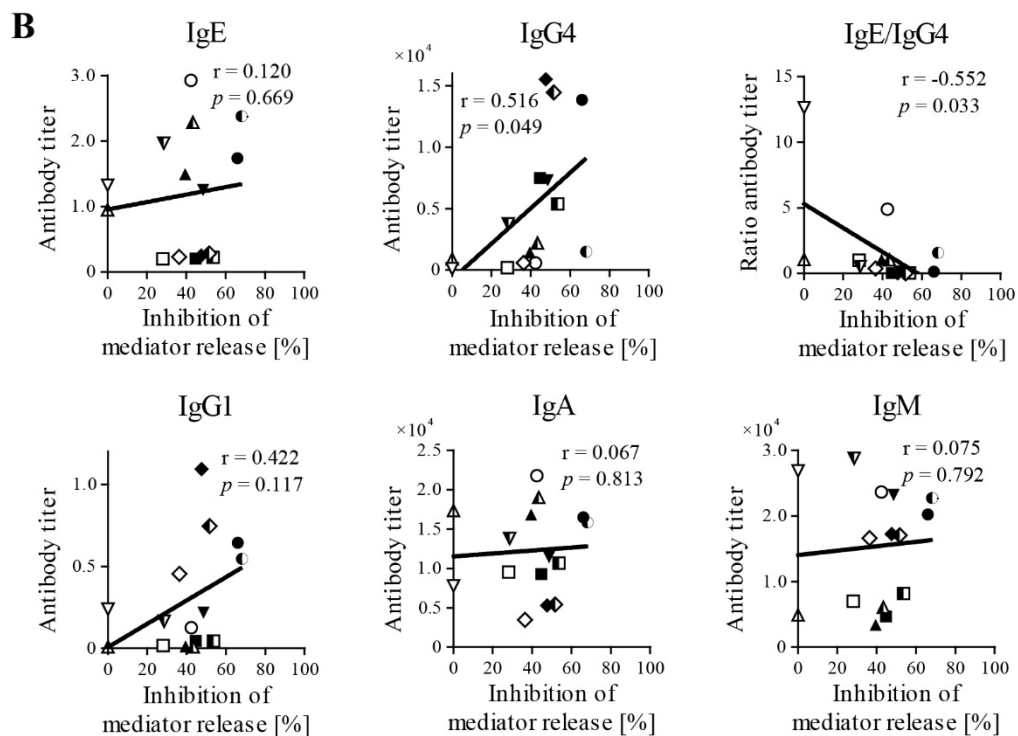

AIT patients (P1○; P2□; P3△; P4▽; P5◇)

**Additional file 9.** Inhibition of mediator release by induced antibodies during AIT. Cells were passively sensitized with a FAB-based indicator serum pool and inhibited with different dilutions of serum samples from three AIT time points (T0, open; T1, semi-filled; T2, filled symbols) (A). Correlation of Bet v 1-specific antibody titer measured by ELISA with inhibition mediator release measured by assays using an indicator serum pool for sensitizing the cells (B).
